# Supplementary material for: Genetic and functional diversity of ubiquitous DNA viruses in selected Chinese agricultural soils
Source: PubMed Central journal article supplement (PMC5361096; doi:10.1038/srep45142), 2017-03-22
Supplement: srep45142-s1.pdf [file srep45142-s1.pdf]

# **Genetic and functional diversity of ubiquitous DNA viruses in selected Chinese agricultural soils**

**Authors:** Li-Li Han<sup>1,2†</sup>, Dan-Ting Yu<sup>1,2†</sup>, Li-Mei Zhang<sup>1,2</sup>, Ju-Pei Shen<sup>1,2</sup>, Ji-Zheng He<sup>1,2,3\*</sup>

<sup>1</sup>State Key Laboratory of Urban and Regional Ecology, Research Center for Eco-Environmental Sciences, Chinese Academy of Sciences, Beijing 100085, China

<sup>2</sup>University of the Chinese Academy of Sciences, Beijing 100039, China

<sup>3</sup>Faculty of Veterinary and Agricultural Sciences, The University of Melbourne, Parkville, Victoria 3010, Australia

\*Correspondence to: Ji-Zheng He. E-mail: [jzhe@rcees.ac.cn](mailto:jzhe@rcees.ac.cn)

Phone: (+) 86 10 62849788

**Supplementary Figure 1.** TEM images of viruses extracted from Chinese agricultural soils. Scale bars represent 200 nm.

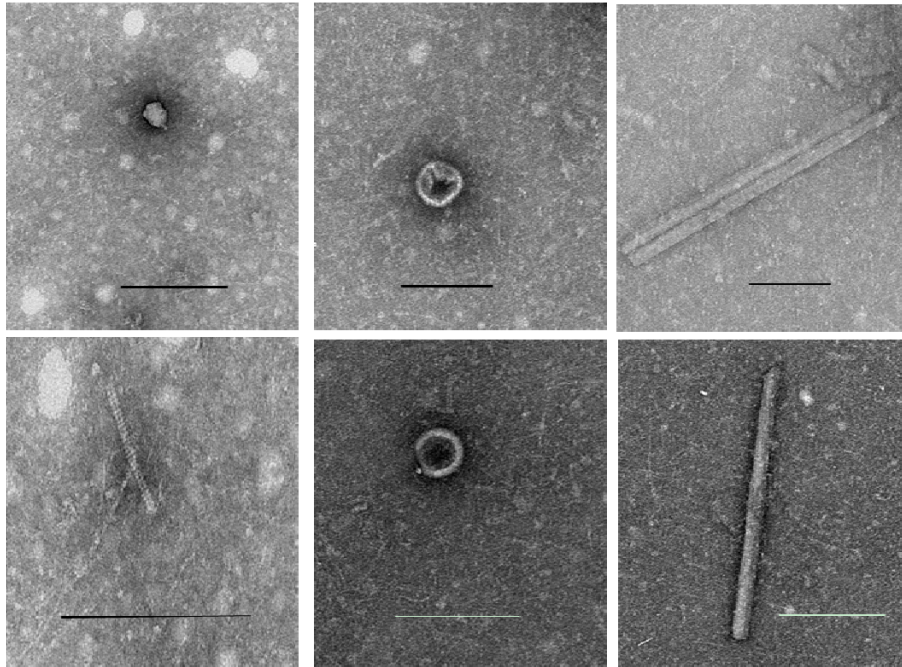

**Bacteriophages**

**Spherical viruses**

**Filamentous viruses**

**Supplementary Figure 2.** Pie charts of taxonomic hits distribution in the six types of soils.

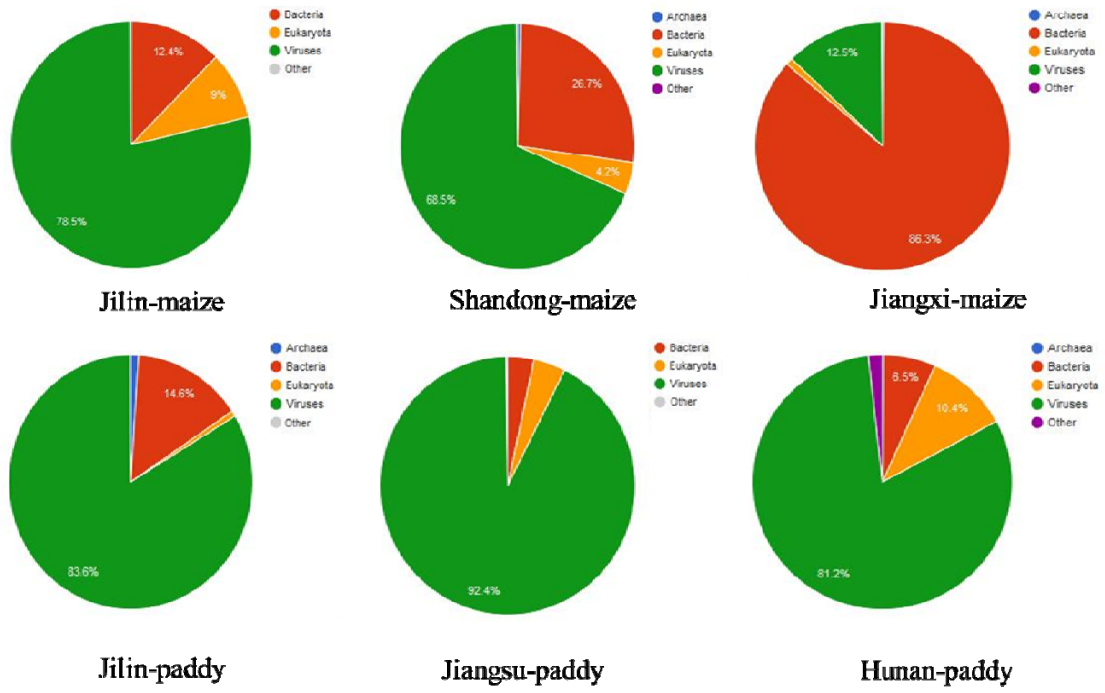

**Supplementary Figure 3a.** The original ratio of functional genes based on the predicted ORFs identified by the MG-RAST server.

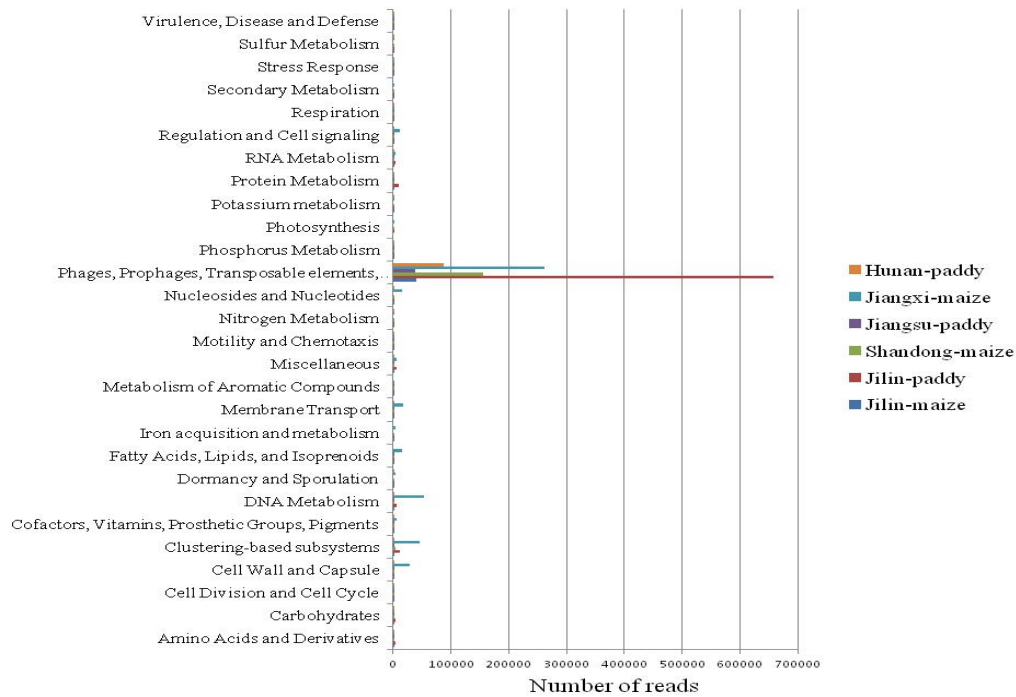

**Supplementary Figure 3b.** The original ratio of phages and prophages, based on the predicted ORFs identified by the MG-RAST server.

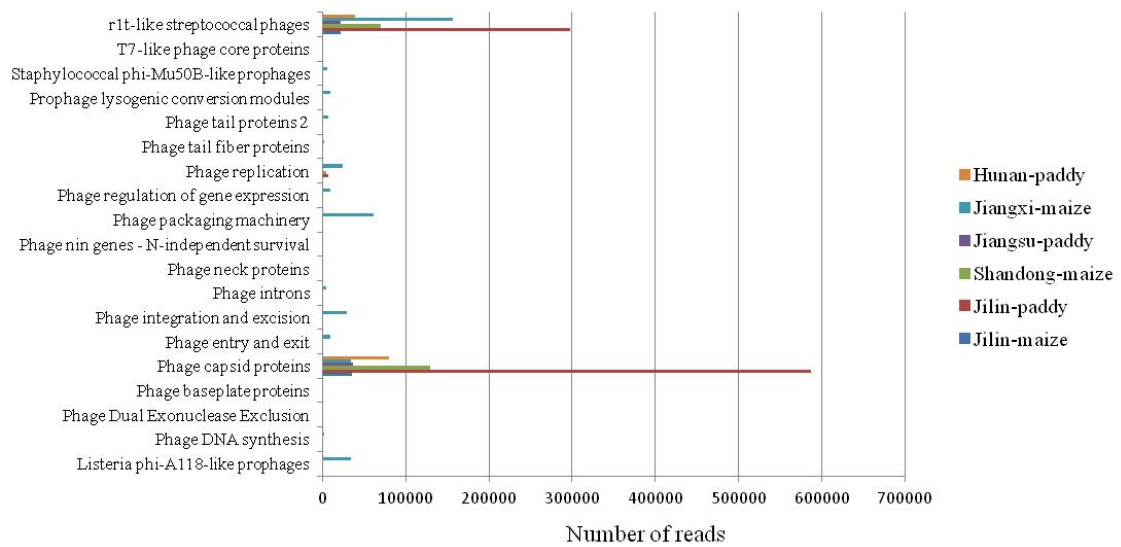

**Supplementary Table 1.** The physical and chemical properties of six agricultural soil and abundance of virus particles

| Soil samples   | Agrotype   | Crop type | pH   | EC( $\mu$ s/cm) | OM(g/kg) | TN (g/kg) | AP(mg/kg) | AK(mg/kg) | Abundance of viruses( $\times 10^{10}$ ) |
|----------------|------------|-----------|------|-----------------|----------|-----------|-----------|-----------|------------------------------------------|
| Jilin-maize    | black soil | maize     | 4.66 | 777.00          | 33.40    | 1.81      | 23.45     | 153.80    | 1.12 $\pm$ 0.15                          |
| Jilin-paddy    | black soil | paddy     | 6.08 | 63.00           | 43.10    | 2.24      | 71.78     | 125.78    | 0.51 $\pm$ 0.04                          |
| Shandong-maize | chao soil  | maize     | 8.29 | 262.00          | 25.78    | 1.48      | 40.36     | 150.88    | 1.50 $\pm$ 0.07                          |
| Jiangsu-paddy  | chao soil  | paddy     | 8.36 | 244.00          | 22.28    | 1.19      | 48.16     | 167.08    | 0.94 $\pm$ 0.09                          |
| Jiangxi-maize  | red soil   | maize     | 4.54 | 35.00           | 10.70    | 0.61      | 17.19     | 132.45    | 0.99 $\pm$ 0.03                          |
| Hunan-paddy    | red soil   | paddy     | 5.42 | 79.10           | 39.13    | 2.08      | 11.58     | 81.93     | 1.01 $\pm$ 0.06                          |

pH and EC: determined by pH meter (Professional Meter PP-20, Sartorius, Germany);

OM: Organic Matter, determined using the  $K_2Cr_2O_7$  oxidation method;

TN: Total Nitrogen, determined using a Vario EL III analyzer (Elementar Analysensysteme GmbH, Hanau, Germany);

AP: Available Phosphorus, determined using the Olsen method;

AK: Available Potassium, which was extracted with 0.5 M ammonium acetate and determined by an atomic absorption spectrophotometer (ZEEnit700P, Analytik Jena AG, Germany).

The unit on the abundance of virus particles was per gram soil (dry weight).

**Supplementary Table 2. List of different types of virome datasets used in this study.**

| <b>Virome</b>            | <b>Geographic zone</b>                        | <b>NMDS1</b> | <b>NMDS2</b> | <b>NMDS3</b> | <b>Reference</b>     |
|--------------------------|-----------------------------------------------|--------------|--------------|--------------|----------------------|
| <b>This study</b>        |                                               |              |              |              |                      |
| Jiangsu_paddy            | Jiangsu, China                                | -0.52896     | 0.09267      | -0.09896     | This study           |
| Jilin_paddy              | Jilin, China                                  | -0.779       | 0.180659     | 0.108105     |                      |
| Jilin_maize              | Jilin, China                                  | -0.8364      | 0.253166     | -0.09354     |                      |
| Hunan_paddy              | Hunan, China                                  | -0.69296     | 0.402876     | 0.118087     |                      |
| Jiangxi_maize            | Jiangxi, China                                | -0.11735     | 0.315246     | -0.58832     |                      |
| Shandong_maize           | Shandong, China                               | -0.44532     | 0.049985     | -0.06597     |                      |
| <b>Air</b>               |                                               |              |              |              |                      |
| Air_Residential_district | Seoul, Korea                                  | -2.33007     | -2.53175     | -0.60253     | Whon et al., 2012    |
| Air_Forest               | Center Korea                                  | -2.63289     | -0.56107     | -0.61417     |                      |
| Air_Industrial_complex   | West Korea                                    | -1.9446      | -2.98596     | -0.28532     |                      |
| Air_Rainwater            | Seoul, Korea                                  | -2.88073     | -1.40083     | -0.29596     |                      |
| <b>Sediments</b>         |                                               |              |              |              |                      |
| Atl_Vir                  | Atlantic Ocean                                | -1.1893      | 0.473859     | -0.50317     | Unpublished          |
| Arct_Vir                 | Arctic Ocean                                  | 0.058695     | 0.675265     | 0.681169     |                      |
| Atlantic_Extra           | Arctic Ocean                                  | -1.96958     | -0.00292     | -0.51771     |                      |
| Arctic_Extra             | Atlantic Ocean                                | -1.45128     | -0.82802     | -1.50801     |                      |
| Izu_Ogasawara_Trench     | Izu-Ogasawara Trench in the northwest Pacific | -0.47046     | 0.758765     | -0.63684     | Yoshida et al., 2013 |
| Mariana_Trench           | Mariana Trench in the northwest Pacific       | -0.8078      | 1.334721     | -0.15327     |                      |
| off_Shimokita_Peninsula  | off Shimokita Peninsula in the                | -0.4343      | 0.17685      | -0.47679     |                      |

| northwest Pacific            |                             |          |          |          |                              |
|------------------------------|-----------------------------|----------|----------|----------|------------------------------|
| Peru_Margin_1mbsf_amplified  | Peru Margin                 | 0.165643 | 0.511027 | -1.09796 | Unpublished                  |
| Peru_Margin_50mbsf_amplified | Peru Margin                 | 1.007283 | 0.605491 | -0.50871 |                              |
| Brazos_Trinity_8mbsf_        | Brazos-Trinity Basin        | 1.157727 | -0.06752 | -0.8875  | Unpublished                  |
| <b>Desert</b>                |                             |          |          |          |                              |
| Antarctic_hypolith_c         | Miers Valley, Antarctica    | -0.714   | 0.118421 | 0.185655 | Zablocki et al., 2014        |
| Antarctic_open_soil_c        | Miers Valley, Antarctica    | -1.05756 | 0.44933  | 0.485011 |                              |
| Antarctic_hypolith_r         | Miers Valley, Antarctica    | -0.38275 | 0.111505 | -0.2558  |                              |
| Antarctic_open_soil_r        | Miers Valley, Antarctica    | -1.33712 | 0.347804 | 0.605646 |                              |
| C60_contigs                  | Namib Desert                | -0.52822 | 0.384378 | 0.579659 | Adriaenssens et al.,<br>2014 |
| Namib_hypolith_2012_contigs  | Namib desert                | -1.2495  | 0.020729 | 0.31691  |                              |
| <b>Soils</b>                 |                             |          |          |          |                              |
| RFPeru                       | Manu National Park          | -0.63711 | 0.699085 | 0.5904   | Fierer et al., 2007          |
| BC                           | Xinjiang, China             | 0.07086  | 0.106793 | 0.004101 | Han et al., 2017             |
| <b>Freshwater</b>            |                             |          |          |          |                              |
| AllContigs_VCSEP_2A          | Lake Lanier                 | -0.09607 | -0.23995 | 0.081451 | Unpublished                  |
| AllContigs_VCJUL_1           | Lake Lanier                 | 0.167374 | -0.07396 | 0.042014 |                              |
| VC_JUL_2                     | Lake Lanier                 | 0.167374 | -0.07396 | 0.042014 |                              |
| Lough_Neagh_4pW_contigs      | Lough Neagh                 | -0.03937 | -0.23048 | 0.512145 | Unpublished                  |
| Antarctic_Lake_Summer        | Lake Limnopolare            | -0.01406 | -0.10981 | -0.58286 | Lopez-Bueno et al.,<br>2009  |
| FTR_January_2008             | Feitsui Reservoir           | 0.008552 | -0.03234 | 0.070429 | Tseng et al., 2012           |
| ElBerbera                    | ponds of Mauritanian Sahara | -0.02429 | 0.038181 | -0.06857 | Fancello et al., 2012        |
| Ilij                         | ponds of Mauritanian Sahara | 0.088408 | 0.037225 | 0.10093  |                              |

|                        |                                   |          |          |          |                         |
|------------------------|-----------------------------------|----------|----------|----------|-------------------------|
| Hamdoun                | ponds of Mauritanian Sahara       | 0.457796 | -0.18917 | 0.243251 |                         |
| Molomhar               | ponds of Mauritanian Sahara       | 0.161279 | -0.047   | 0.154026 |                         |
| Jamestown_High_School  | Jamestown High School BMP         | 0.225889 | -0.44875 | 0.299974 |                         |
| John_Tyler_199         | John Tyler BMP                    | 0.260027 | -0.31199 | -0.25424 | Saxton et al., 2016     |
| Crim_Dell              | Crim Dell Pond                    | 0.301258 | -0.32898 | 0.223002 |                         |
| Greensprings           | Greensprings Park                 | 0.705603 | -0.85216 | 0.147513 |                         |
| Matoaka_Open           | Williamsburg, VA                  | 0.522313 | -0.24163 | 0.438957 | Green et al., 2015      |
| Crim_Dell_Mouth        | Williamsburg, VA                  | 0.714895 | -0.3454  | 0.276694 |                         |
| Lake_Pavin_c           | Lake Pavin                        | 0.570696 | -0.27    | -0.14465 | Roux et al., 2012       |
| Lake_Pavin             | Lake Pavin                        | 0.49251  | -0.53204 | -0.22811 |                         |
| Lake_Bourget           | Lake Bourget                      | 0.778089 | -0.36312 | -0.17476 |                         |
| Lake_Bourget_c         | Lake Bourget                      | 0.877705 | -0.34708 | -0.26005 |                         |
| L2010_RNAVirome        | Lake Limnopolar, Antarctica       | 0.760051 | 0.006777 | -0.08784 | López-Bueno et., 2015   |
| L2006_RNAVirome        | Lake Limnopolar, Antarctica       | 0.712852 | -0.61214 | -0.19285 |                         |
| <b>Seawater</b>        |                                   |          |          |          |                         |
| Sargasso_Sea_2005      | Sargasso Sea                      | 0.861092 | -0.2163  | -0.54439 | Angly et al., 2015      |
| Dunk_Island_TT_3       | Dunk Island                       | 0.896937 | -0.17536 | 0.670613 | Hurwitz et al., 2013    |
| Fitzroy_Island_Contigs | Fitzroy Island                    | 0.992523 | -0.31525 | 0.71717  | Massey et al., 2013     |
| Dunk_Island_Contigs    | Dunk Island                       | 0.928416 | -0.18328 | 0.803672 |                         |
| Tampa_Bay_induced      | Tampa Bay                         | 0.984977 | -0.15377 | -0.46932 | Unpublished             |
| Coral_Atoll_Palmyra    | Northern Line Islands             | 0.905407 | -0.0087  | -0.63736 | Dinsdale et al., 2008   |
| GS112                  | Indian ocean                      | 1.003071 | -0.11725 | 0.039631 | Williamson et al., 2012 |
| GS117                  | Saint-Anne Island                 | 1.12538  | -0.04682 | 0.134201 |                         |
| Saanich_200m_r200      | Saanich Inlet, Vancouver BC Canad | 1.138292 | -0.6949  | -0.6355  | Chow et al., 2015       |
| Saanich_10m_r200       | Saanich Inlet, Vancouver BC Canad | 1.182757 | -0.84652 | -0.66964 |                         |



|                     |                                            |          |          |          |                      |
|---------------------|--------------------------------------------|----------|----------|----------|----------------------|
| 2008OMZst3viral200m | Iquique                                    | 1.287629 | 0.104718 | -1.83268 | Cassman et al., 2012 |
| LA26S               | LineP transect, eastern North Pacific      | 1.14491  | -0.42033 | 0.44599  |                      |
| LF26S               | LineP transect, eastern North Pacific      | 1.226974 | -0.35559 | 0.256938 |                      |
| M2MS                | MBARI transect, intermediate ocean station | 1.326953 | -0.42837 | 0.294653 |                      |
| SFCS                | Scripps Pier, San Diego, CA                | 1.362426 | -0.5293  | 0.625738 |                      |
| SFDS                | Scripps Pier, San Diego, CA                | 1.391033 | -0.50384 | 0.499515 |                      |
| LJ26S               | LineP transect, eastern North Pacific      | 1.470894 | -0.42904 | -0.13045 |                      |
| SFSS                | Scripps Pier, San Diego, CA                | 1.470964 | -0.50847 | 0.631856 | Hurwitz et al., 2013 |
| M5OD                | MBARI transect, open ocean station         | 1.498676 | -0.19471 | -0.05854 |                      |
| M1CS                | MBARI transect, coastal station            | 1.015424 | -0.62221 | 0.67353  |                      |
| Fitzroy_Island_F1   | Fitzroy Island                             | 1.025676 | -0.27264 | 0.539584 |                      |
| M4OS                | MBARI transect, open ocean station         | 1.035668 | -0.35852 | 0.523984 |                      |
| LJ4S                | LineP transect, eastern North Pacific      | 1.588102 | -0.55363 | 0.307956 |                      |
| LJ12S               | LineP transect, eastern North Pacific      | 1.757716 | -0.81118 | -0.08438 |                      |

**Supplementary Table 3.** Taxonomic composition of metagenomes in different types of samples by Metavir analysis

| Systems    | Location                                   | % of total sequences |     |                     |    |                     |    | Reference                   |
|------------|--------------------------------------------|----------------------|-----|---------------------|----|---------------------|----|-----------------------------|
|            |                                            | group                |     | order               |    | family              |    |                             |
| seawater   | Iquique, Chile (10m)                       | dsDNA                | 81  | <i>Caudovirales</i> | 66 | <i>Myoviridae</i>   | 39 | Cassman et al. 2012         |
|            | Iquique, Chile (90m)                       | dsDNA                | 56  | <i>Caudovirales</i> | 39 |                     |    |                             |
|            |                                            | ssDNA                | 43  | <i>Circoviridae</i> | 33 |                     |    |                             |
|            | Iquique, Chile (200m)                      | dsDNA                | 89  | <i>Caudovirales</i> | 73 | <i>Myoviridae</i>   | 39 |                             |
| seawater   | Northern Line Islands                      | dsDNA                | 100 | <i>Caudovirales</i> | 83 |                     |    | Dinsdale et al. 2008        |
| seawater   | Indian Ocean                               | dsDNA                | 99  | <i>Caudovirales</i> | 79 | <i>Myoviridae</i>   | 27 | Williamson et al. 2012      |
|            |                                            |                      |     |                     |    | <i>Podoviridae</i>  | 32 |                             |
|            |                                            |                      |     |                     |    | <i>Siphoviridae</i> | 17 |                             |
| freshwater | Lake Limnopolar, Antarctica                | ssDNA                | 50  | <i>Microviridae</i> | 40 |                     |    | López-Bueno et al. 2009     |
| freshwater | Lake Bourget in France                     | dsDNA                | 67  | <i>Caudovirales</i> | 54 | <i>Myoviridae</i>   | 18 | Roux et al. 2012            |
|            |                                            |                      |     |                     |    | <i>Podoviridae</i>  | 15 |                             |
|            |                                            |                      |     |                     |    | <i>Siphoviridae</i> | 19 |                             |
|            |                                            | ssDNA                | 37  | <i>Microviridae</i> | 30 |                     |    |                             |
|            |                                            | dsDNA                | 80  | <i>Caudovirales</i> | 66 | <i>Myoviridae</i>   | 25 |                             |
|            |                                            |                      |     |                     |    | <i>Podoviridae</i>  | 13 |                             |
|            |                                            |                      |     |                     |    | <i>Siphoviridae</i> | 29 |                             |
| freshwater | Salton Sea (Kent SeaTech) in United States | dsDNA                | 98  | <i>Caudovirales</i> | 93 | <i>Myoviridae</i>   | 19 | Rodriguez-Brito et al. 2010 |
|            |                                            |                      |     |                     |    | <i>Podoviridae</i>  | 46 |                             |
|            |                                            |                      |     |                     |    | <i>Siphoviridae</i> | 27 |                             |
| freshwater | Jiulong river in China                     | dsDNA                | 99  | <i>Caudovirales</i> | 84 | <i>Myoviridae</i>   | 26 | Cai et al. 2016             |
|            |                                            |                      |     |                     |    | <i>Podoviridae</i>  | 31 |                             |
|            |                                            |                      |     |                     |    | <i>Siphoviridae</i> | 23 |                             |

|          |                                |       |      |                     |      |                        |      |                          |
|----------|--------------------------------|-------|------|---------------------|------|------------------------|------|--------------------------|
| Sediment | Izu-Ogasaware Trench           | ssDNA | 81   | <i>Microviridae</i> | 74   |                        |      |                          |
|          | Mariana Trench                 | ssDNA | 76   | <i>Circoviridae</i> | 36   | <i>Gokushovirinae</i>  | 32   | Yoshida et al. 2013      |
|          | Shimokita Peninsula            | ssDNA | 97   | <i>Microviridae</i> | 36   | <i>Circoviridae</i>    | 50   |                          |
| Sediment | Arctic Ocean                   | ssDNA | 68   | <i>Inoviridae</i>   | 45   |                        | 29   | Dell'Anno et al. 2015    |
| Sediment | Brazos-Trinity Basin in Mexico | dsDNA | 95   | <i>Caudovirales</i> | 51   | <i>Phycodnaviridae</i> | 20   | Biddle et al. 2011       |
| soil     | Antarctic open soil            | dsDNA | 76   | <i>Caudovirales</i> | 70   | <i>Myoviridae</i>      | 25   |                          |
|          |                                |       |      |                     |      | <i>Podoviridae</i>     | 15   | Zablocki et al. 2014     |
|          |                                |       |      |                     |      | <i>Siphoviridae</i>    | 27   |                          |
| soil     | Namib desert                   | dsDNA | 80   | <i>Caudovirales</i> | 75   | <i>Myoviridae</i>      | 9    |                          |
|          |                                |       |      |                     |      | <i>Podoviridae</i>     | 10   | Adriaenssens et al. 2014 |
|          |                                |       |      |                     |      | <i>Siphoviridae</i>    | 48   |                          |
| soil     | Coastal soil in Scotland       | ssDNA | 88   | <i>Microviridae</i> | 84.6 |                        |      |                          |
|          | Brown earth in Scotland        | ssDNA | 71.6 | <i>Microviridae</i> | 50.3 |                        |      | Reavy et al. 2015        |
| soil     | Jilin-maize                    | ssDNA | 90.2 | <i>Circoviridae</i> | 34.3 |                        |      |                          |
|          | Jilin-paddy                    | ssDNA | 85.6 | <i>Microviridae</i> | 61.9 |                        |      |                          |
|          | Shandong-maize                 | ssDNA | 54.6 | <i>Microviridae</i> | 26.2 |                        |      |                          |
|          | Jiangsu-paddy                  | ssDNA | 85   | <i>Microviridae</i> | 39.5 |                        |      | This study               |
|          | Jiangxi-maize                  | dsDNA | 90.1 | <i>Caudovirales</i> | 79.3 | <i>Siphoviridae</i>    | 50.4 |                          |
|          | Hunan-paddy                    | ssDNA | 92.5 | <i>Circoviridae</i> | 34.6 |                        |      |                          |

## References

- Adriaenssens, E.M., Van Zyl, L., De Maayer, P., Rubagotti, E., Rybicki, E., Tuffin, M., et al. (2015): Metagenomic analysis of the viral community in Namib Desert hypoliths. *Environ Microbiol* 17, 480-495.
- Biddle JF, White JR, Teske AP, House CH (2011): Metagenomics of the subsurface Brazos-Trinity Basin (IODP site 1320): comparison with other sediment and pyrosequenced metagenomes. *ISME J* 5, 1038-1047
- Cai L, Zhang R, He Y, Feng X, Jiao N (2016): Metagenomic Analysis of Virioplankton of the Subtropical Jiulong River Estuary, China. *Viruses* 8, 35
- Cassman N, Prieto - Davó A, Walsh K, Silva GG, Angly F, Akhter S, Barott K, Busch J, McDole T, Haggerty JM (2012): Oxygen minimum zones harbour novel viral communities with low diversity. *Environ Microbiol* 14, 3043-3065
- Dell'Anno A, Corinaldesi C, Danovaro R (2015): Virus decomposition provides an important contribution to benthic deep-sea ecosystem functioning. *PNAS* 112, E2014-E2019
- Dinsdale EA, Pantos O, Smriga S, Edwards RA, Angly F, Wegley L, Hatay M, Hall D, Brown E, Haynes M (2008): Microbial ecology of four coral atolls in the Northern Line Islands. *PLoS One* 3, e1584
- López-Bueno A, Tamames J, Velázquez D, Moya A, Quesada A, Alcamí A (2009): High diversity of the viral community from an Antarctic lake. *Science* 326, 858-861
- Reavy B, Swanson MM, Cock PJ, Dawson L, Freitag TE, Singh BK, Torrance L, Mushegian AR, Taliany M (2015): Distinct Circular Single-Stranded DNA Viruses Exist in Different Soil Types. *Appl Environ Microbiol* 81, 3934-3945
- Rodriguez-Brito B, Li L, Wegley L, Furlan M, Angly F, Breitbart M, Buchanan J, Desnues C, Dinsdale E, Edwards R (2010): Viral and microbial community dynamics in four aquatic environments. *ISME J* 4, 739-751
- Roux S, Enault F, Robin A, Ravet V, Personnic S, Theil S, Colombet J, Sime-Ngando T, Debross D (2012): Assessing the diversity and specificity of two freshwater viral communities through metagenomics. *PLoS One* 7, e33641
- Whon TW, Kim M-S, Roh SW, Shin N-R, Lee H-W, Bae J-W (2012): Metagenomic characterization of airborne viral DNA diversity in the near-surface atmosphere. *J Virol* 86, 8221-8231
- Williamson SJ, Allen LZ, Lorenzi HA, Fadrosch DW, Bami D, Thiagarajan M, McCrow JP, Tovchigrechko A, Yooseph S, Venter JC (2012): Metagenomic exploration of viruses throughout the Indian Ocean. *PLoS One* 7, e42047
- Yoshida M, Takaki Y, Eitoku M, Nunoura T, Takai K (2013): Metagenomic analysis of viral communities in (hado) pelagic sediments. *PLoS One* 8, e57271
- Zablocki O, van Zyl L, Adriaenssens EM, Rubagotti E, Tuffin M, Cary SC, Cowan D (2014): High-level diversity of tailed Phages, eukaryote-associated viruses, and virophage-like elements in the metaviromes of Antarctic soils. *Appl Environ Microbiol* 80, 6888-6897
